# Supplementary material for: Chemical reaction-transport model of oxidized diethylzinc based on quantum mechanics and computational fluid dynamics approaches
Source: Royal Society of Chemistry journal article supplement (doi:10.1039/c7ra11534b), 2018-01-01
Supplement: c7ra11534b1.pdf [file c7ra11534b1.pdf]

## Supporting Information for

# Chemical reaction-transport model of oxidized diethylzinc based on quantum mechanics and computational fluid dynamics approaches

Jian Li<sup>a</sup>, Hanlin Gan<sup>b</sup>, Yifeng Xu<sup>a</sup>, Chaoyang Wang<sup>b</sup>, FengLong Gu<sup>\*b</sup>, Gang Wang<sup>\*a,c</sup>

<sup>a</sup>School of Electronics and Information Technology, Sun Yat-sen University, Guangzhou 51000, China

<sup>b</sup>Key Laboratory of Theoretical Chemistry of Environment, Ministry of Education, School of Chemistry and Environment, South China Normal University, Guangzhou 510006, China

<sup>c</sup>State Key Laboratory of Optoelectronic Materials and Technologies, Guangzhou 510275, China

number of pages: 29

number of tables: 29

number of figures: 5

## Geometries Optimized at B3LYP/6-311G(d)

Table S1

Structure: IM1

-2088.1551506 Hartree

0 3

|    |           |           |           |
|----|-----------|-----------|-----------|
| Zn | 0.440591  | -0.527181 | -0.190144 |
| C  | 1.729902  | 0.929990  | -0.008433 |
| H  | 1.680995  | 1.557764  | -0.906342 |
| H  | 1.412130  | 1.580602  | 0.815433  |
| C  | 3.180082  | 0.475280  | 0.223780  |
| H  | 3.869925  | 1.322110  | 0.320351  |
| H  | 3.282975  | -0.121131 | 1.136379  |
| H  | 3.553280  | -0.143460 | -0.599007 |
| O  | -1.574673 | 1.768838  | -0.821649 |
| H  | -2.674399 | -0.912541 | 0.124137  |
| O  | -1.493141 | 2.921017  | -0.475886 |
| C  | -0.827403 | -2.004281 | -0.348288 |
| H  | -0.336373 | -2.929402 | -0.023331 |
| H  | -1.060261 | -2.157981 | -1.408869 |
| C  | -2.132799 | -1.809552 | 0.441202  |
| H  | -2.820599 | -2.654732 | 0.319247  |
| H  | -1.951197 | -1.703485 | 1.515957  |

**Table S2**

Structure: TS1

-2088.0837547 Hartree

0 3

|    |           |           |           |
|----|-----------|-----------|-----------|
| Zn | 0.497572  | -0.339560 | 0.009114  |
| C  | 1.985624  | 0.923908  | 0.010382  |
| H  | 1.855485  | 1.586115  | -0.852449 |
| H  | 1.875127  | 1.567308  | 0.890156  |
| C  | 3.384805  | 0.291962  | -0.011164 |
| H  | 4.176179  | 1.050592  | -0.009534 |
| H  | 3.561110  | -0.349923 | 0.858077  |
| H  | 3.543872  | -0.328047 | -0.899387 |
| O  | -1.701096 | 1.163881  | -0.133862 |
| H  | -2.173044 | 0.198414  | -0.085747 |
| O  | -2.570608 | 2.111784  | 0.091263  |
| C  | -0.867165 | -1.813201 | 0.022434  |
| H  | -0.624188 | -2.377454 | 0.929204  |
| H  | -0.601826 | -2.427484 | -0.844074 |
| C  | -2.278503 | -1.396781 | -0.006511 |
| H  | -2.852889 | -1.532477 | -0.919981 |
| H  | -2.861924 | -1.440875 | 0.910276  |

**Table S3**

Structure: IM2

-2088.0841882 Hartree

0 3

|    |            |           |            |
|----|------------|-----------|------------|
| Zn | 0.503426   | -0.383902 | -0.037 249 |
| C  | 1.967634   | 0.907620  | -0.059617  |
| H  | 1.866909   | 1.505174  | -0.972138  |
| H  | 1.805069   | 1.608651  | 0.766308   |
| C  | 3.375974   | 0.302483  | 0.026647   |
| H  | 4.154476   | 1.074189  | 0.009889   |
| H  | 3.522117   | -0.273252 | 0.946364   |
| H  | 3.585576   | -0.375445 | -0.807155  |
| O  | -1.651411  | 1.189112  | -0.250779  |
| H  | -2.157526  | 0.309714  | -0.170342  |
| O  | -2.291681  | 2.106786  | 0.450278   |
| C  | -0.830067  | -1.885052 | 0.008526   |
| H  | -0.568767  | -2.423761 | 0.926317   |
| H  | -0.552942  | -2.513258 | -0.844471  |
| C  | -2.247 200 | -1.511539 | -0.022129  |
| H  | -2.823893  | -1.624349 | -0.935662  |
| H  | -2.820381  | -1.468137 | 0.899530   |

**Table S4**

Structure: CP

-2088.0724 Hartree

**Spin Conversion Point**

|    |           |           |            |
|----|-----------|-----------|------------|
| Zn | 0.270790  | -0.007678 | -0.052795  |
| C  | 1.925606  | 1.036560  | 0.004801   |
| H  | 1.891330  | 1.724980  | -0.846423  |
| H  | 1.876915  | 1.672783  | 0.894816   |
| C  | 3.231014  | 0.233301  | -0.006046  |
| H  | 4.112731  | 0.884395  | 0.020062   |
| H  | 3.307629  | -0.437023 | 0.855884   |
| H  | 3.324790  | -0.389328 | -0.901410  |
| O  | -1.614833 | 0.965561  | -0.332743  |
| H  | -2.268293 | 0.244809  | -0.055497  |
| O  | -1.918626 | 2.156097  | 0.241325   |
| C  | -0.877485 | -1.791691 | 0.027806   |
| H  | -0.476797 | -2.186332 | 0.964334   |
| H  | -0.450884 | -2.291657 | -0.8446 94 |
| C  | -2.281956 | -1.623781 | -0.000674  |
| H  | -2.840873 | -1.705371 | -0.926719  |
| H  | -2.862527 | -1.597463 | 0.916171   |

**Table S5**

Structure: TS2

-2088.0478947 Hartree

0 3

|    |           |           |           |
|----|-----------|-----------|-----------|
| Zn | 0.310620  | -0.098699 | 0.030593  |
| C  | 2.143500  | -0.801348 | 0.070543  |
| H  | 2.282223  | -1.323227 | 1.024001  |
| H  | 2.221497  | -1.577060 | -0.699238 |
| C  | 3.252928  | 0.242448  | -0.120503 |
| H  | 4.250630  | -0.210854 | -0.084843 |
| H  | 3.174377  | 0.756911  | -1.083750 |
| H  | 3.229772  | 1.015892  | 0.654009  |
| O  | -1.536018 | -0.924689 | -0.000699 |
| H  | -2.188428 | -0.208515 | -0.022500 |
| O  | -2.496700 | -2.181261 | -0.014360 |
| C  | -0.713210 | 1.869823  | 0.000967  |
| H  | -0.156567 | 2.167167  | -0.890587 |
| H  | -0.215470 | 2.166375  | 0.926910  |
| C  | -2.091185 | 2.105310  | -0.043729 |
| H  | -2.683742 | 2.177767  | 0.861659  |
| H  | -2.624232 | 2.176513  | -0.985424 |

**Table S6**

Structure: IM3

-2088.1229398 Hartree

0 3

|    |           |           |           |
|----|-----------|-----------|-----------|
| Zn | -1.060903 | -0.060194 | -0.366407 |
| C  | -2.560333 | -1.275761 | -0.371040 |
| H  | -2.703076 | -1.631825 | -1.396944 |
| H  | -2.281190 | -2.163370 | 0.206516  |
| C  | -3.873562 | -0.687092 | 0.164783  |
| H  | -4.688288 | -1.419150 | 0.131824  |
| H  | -3.783632 | -0.357222 | 1.204320  |
| H  | -4.200892 | 0.181092  | -0.414947 |
| O  | -0.139712 | 1.574117  | -0.333707 |
| H  | 0.523674  | 1.816126  | 0.322582  |
| O  | 1.033443  | -0.286963 | -0.494362 |
| C  | 2.491579  | 3.446389  | 0.161917  |
| H  | 2.652193  | 4.418774  | 0.618553  |
| H  | 1.841342  | 3.417270  | -0.706416 |
| C  | 3.060626  | 2.342740  | 0.638612  |
| H  | 2.898489  | 1.374313  | 0.175594  |
| H  | 3.713515  | 2.368309  | 1.506626  |

**Table S7**

Structure: IM4

**-2088.1649436 Hartree**

0 1

|    |           |           |           |
|----|-----------|-----------|-----------|
| Zn | 0.110728  | 0.761479  | 0.390764  |
| C  | 1.964254  | 0.598594  | -0.117766 |
| H  | 1.991776  | 0.360891  | -1.186224 |
| H  | 2.443719  | 1.577460  | -0.014502 |
| C  | 2.748460  | -0.458341 | 0.672108  |
| H  | 3.785279  | -0.534567 | 0.325443  |
| H  | 2.786896  | -0.229230 | 1.741614  |
| H  | 2.305210  | -1.453476 | 0.573515  |
| O  | -2.276306 | 1.389070  | -0.279904 |
| H  | -3.137177 | 1.661990  | 0.057694  |
| O  | -1.583538 | 1.108846  | 1.000990  |
| C  | -0.434704 | -2.489125 | -0.717786 |
| H  | 0.216832  | -3.213063 | -0.237249 |
| H  | -0.328896 | -2.389457 | -1.794163 |
| C  | -1.315044 | -1.766079 | -0.030206 |
| H  | -1.982741 | -1.053255 | -0.502168 |
| H  | -1.432125 | -1.878487 | 1.042982  |



**Table S8**

Structure: IM5

**-2009.5493196 Hartree**

0 1

|    |           |           |           |
|----|-----------|-----------|-----------|
| Zn | -0.079120 | -0.017705 | 0.009608  |
| C  | 1.712747  | 0.686231  | 0.018090  |
| H  | 1.800726  | 1.395363  | -0.811263 |
| H  | 1.842325  | 1.276646  | 0.930706  |
| C  | 2.816063  | -0.378224 | -0.081100 |
| H  | 3.813394  | 0.075191  | -0.074864 |
| H  | 2.783300  | -1.085629 | 0.753008  |
| H  | 2.740145  | -0.966772 | -1.000306 |
| O  | -2.542241 | 0.500140  | -0.068821 |
| H  | -3.429786 | 0.125026  | -0.074247 |
| O  | -1.746071 | -0.750764 | 0.001759  |

**Table S9**

Structure: TS3

**-2009.4674813 Hartree**

0 1

|    |           |           |           |
|----|-----------|-----------|-----------|
| Zn | 0.334359  | -0.732788 | 0.158109  |
| C  | -1.624205 | -0.814778 | 0.054169  |
| C  | -1.913667 | 0.659907  | -0.033925 |
| H  | -2.041695 | -1.272464 | 0.951332  |
| H  | -1.961535 | -1.365338 | -0.824543 |
| H  | -0.880504 | 1.302794  | 0.096064  |
| H  | -2.269276 | 1.001273  | -1.006011 |
| H  | -2.515387 | 1.067881  | 0.779176  |
| O  | 2.079795  | -0.081155 | 0.266001  |
| O  | 0.465314  | 1.203387  | 0.178497  |
| H  | 2.464619  | 0.272223  | -0.542359 |

**Table S10**

Structure: IM6

-2009.6324133 Hartree

0 1

|    |           |           |           |
|----|-----------|-----------|-----------|
| Zn | 0.429818  | -0.422676 | -0.139659 |
| C  | -1.493571 | -0.501252 | 0.054222  |
| C  | -1.935442 | 0.948488  | -0.057246 |
| H  | -1.747647 | -0.916997 | 1.033023  |
| H  | -1.974458 | -1.124017 | -0.703476 |
| H  | -1.052864 | 2.689795  | 0.350995  |
| H  | -2.209424 | 1.193816  | -1.091193 |
| H  | -2.793114 | 1.182384  | 0.586257  |
| O  | 2.201211  | -0.456874 | -0.355225 |
| O  | -0.802841 | 1.758707  | 0.343715  |
| H  | 2.676524  | 0.357974  | -0.180147 |

**Table S11**

Structure: TS4

-2009.5953428 Hartree

0 1

|    |           |           |           |
|----|-----------|-----------|-----------|
| Zn | -0.410804 | 0.595272  | -0.011026 |
| C  | 1.008386  | -1.059286 | -0.064920 |
| C  | 2.119256  | -0.232269 | 0.096389  |
| H  | 0.855663  | -1.521291 | -1.036814 |
| H  | 0.689451  | -1.654658 | 0.787153  |
| H  | 1.577126  | 2.386620  | 0.338323  |
| H  | 2.572611  | -0.099000 | 1.070394  |
| H  | 2.752778  | 0.019930  | -0.743185 |
| O  | -2.205380 | 0.689326  | 0.009149  |
| O  | 1.254125  | 1.512809  | 0.086638  |
| H  | -2.687746 | -0.082606 | -0.292877 |

**Table S12**

Structure: IM7

**-2009.6218768 Hartree**

0 1

|    |           |           |           |
|----|-----------|-----------|-----------|
| Zn | -0.259355 | 0.206256  | -0.017983 |
| C  | 1.448915  | -1.610732 | -0.548011 |
| C  | 1.788041  | -1.153789 | 0.659597  |
| H  | 1.853799  | -1.162544 | -1.449222 |
| H  | 0.748797  | -2.432076 | -0.658542 |
| H  | 0.352495  | 2.344197  | -0.998493 |
| H  | 1.371920  | -1.592470 | 1.560368  |
| H  | 2.476922  | -0.322940 | 0.769684  |
| O  | -1.394716 | -0.943267 | 0.735952  |
| O  | 0.720735  | 1.487136  | -0.778006 |
| H  | -2.309978 | -0.714752 | 0.905791  |

**Table S13**Structure: Zn(OH)<sub>2</sub>**-1930.9983068 Hartree**

0 1

|    |           |           |           |
|----|-----------|-----------|-----------|
| Zn | -0.723842 | 0.302268  | 0.075846  |
| O  | 0.386204  | 1.668943  | 0.189316  |
| O  | -1.821264 | -1.073931 | -0.045107 |
| H  | -1.930916 | -1.626685 | 0.731380  |
| H  | 0.279773  | 2.383824  | -0.441642 |

**Table S14**

Structure: TS1-1

**-1930.8633619 Hartree**

0 1

|    |           |           |           |
|----|-----------|-----------|-----------|
| Zn | 0.365858  | -0.525001 | -0.029107 |
| O  | 0.758338  | 1.266175  | 0.010229  |
| O  | -1.498238 | 0.364656  | -0.075747 |
| H  | -2.151492 | 0.522460  | 0.610165  |
| H  | -0.603302 | 1.155816  | -0.033484 |

**Table S15**

Structure: IM1-1

**-1930.8702615 Hartree**

0 1

|    |           |           |           |
|----|-----------|-----------|-----------|
| Zn | 0.483417  | -0.292404 | 0.004374  |
| O  | 0.169196  | 1.478274  | 0.016149  |
| O  | -1.787068 | -0.315848 | -0.073126 |
| H  | -2.570057 | -0.402595 | 0.477726  |
| H  | -1.484213 | 0.631408  | -0.064139 |

**Table S16**

Structure: ZnO

**-1854.4006799 Hartree**

0 1

|    |          |           |          |
|----|----------|-----------|----------|
| Zn | 0.484501 | -0.369052 | 0.004135 |
| O  | 0.417367 | 1.418522  | 0.007797 |

**Table S17**Structure: Zn<sub>2</sub>(OH)<sub>4</sub>**-3862.0775224 Hartree**

0 1

|    |           |           |           |
|----|-----------|-----------|-----------|
| Zn | 1.110613  | -0.412906 | 0.208198  |
| O  | 0.502467  | 1.394676  | 0.013256  |
| H  | 1.002775  | 2.206172  | -0.016524 |
| O  | 2.616226  | -1.363977 | 0.400512  |
| H  | 2.528907  | -2.316161 | 0.473379  |
| Zn | -1.390403 | 1.115503  | -0.106231 |
| O  | -0.799314 | -0.719868 | 0.090132  |
| H  | -1.299059 | -1.531841 | 0.120806  |
| O  | -2.922750 | 2.023246  | -0.296793 |
| H  | -3.735872 | 1.515248  | -0.316080 |

**Table S18**Structure:  $\text{Zn}_3(\text{OH})_6$ 

-5793.1608123 Hartree

0 1

|    |           |           |           |
|----|-----------|-----------|-----------|
| Zn | -2.698720 | 0.535267  | 0.014461  |
| O  | -1.515907 | -0.784314 | -0.690275 |
| H  | -1.720281 | -1.616365 | -1.109388 |
| O  | -4.434499 | 0.980084  | 0.097805  |
| H  | -4.667592 | 1.721427  | 0.659761  |
| Zn | 0.188913  | -0.072491 | -0.045110 |
| O  | -1.024648 | 1.266612  | 0.671258  |
| H  | -0.823881 | 2.127891  | 1.028882  |
| O  | 1.826690  | 0.589367  | -0.887488 |
| H  | 1.990095  | 1.391342  | -1.377256 |
| Zn | 3.072080  | -0.683510 | -0.205168 |
| O  | 1.466138  | -1.364061 | 0.647630  |
| H  | 1.300349  | -2.200142 | 1.076006  |
| O  | 4.809224  | -1.128514 | -0.249112 |
| H  | 5.093483  | -1.832000 | 0.337417  |

**Table S19****Structure: TS3-1****-5793.1006848 Hartree****0 1**

|           |                  |                  |                  |
|-----------|------------------|------------------|------------------|
| <b>Zn</b> | <b>-3.246439</b> | <b>-0.734135</b> | <b>0.036217</b>  |
| <b>O</b>  | <b>-1.644749</b> | <b>-1.519426</b> | <b>-0.654753</b> |
| <b>H</b>  | <b>1.534740</b>  | <b>-2.287156</b> | <b>-1.210082</b> |
| <b>O</b>  | <b>-5.022518</b> | <b>-0.957799</b> | <b>0.074394</b>  |
| <b>H</b>  | <b>-5.539822</b> | <b>-0.304200</b> | <b>0.548541</b>  |
| <b>Zn</b> | <b>-0.333801</b> | <b>-0.278300</b> | <b>0.023792</b>  |
| <b>O</b>  | <b>-1.931039</b> | <b>0.521324</b>  | <b>0.730057</b>  |
| <b>H</b>  | <b>-2.035536</b> | <b>1.295195</b>  | <b>1.278387</b>  |
| <b>O</b>  | <b>3.722382</b>  | <b>2.619656</b>  | <b>0.618425</b>  |
| <b>H</b>  | <b>4.580883</b>  | <b>2.775383</b>  | <b>0.218899</b>  |
| <b>Zn</b> | <b>2.887936</b>  | <b>1.128272</b>  | <b>0.089526</b>  |
| <b>O</b>  | <b>1.433993</b>  | <b>-0.051042</b> | <b>-0.027500</b> |
| <b>H</b>  | <b>2.301692</b>  | <b>-0.660395</b> | <b>-0.653649</b> |
| <b>O</b>  | <b>3.460068</b>  | <b>-0.501489</b> | <b>-1.015290</b> |
| <b>H</b>  | <b>4.066641</b>  | <b>-1.184673</b> | <b>-0.722579</b> |

**Table S20**

Structure: IM3-1

**-5793.1091240 Hartree**

0 1

|    |           |           |           |
|----|-----------|-----------|-----------|
| Zn | -3.193601 | 0.098604  | -0.049189 |
| O  | -1.869493 | -1.278491 | -0.100378 |
| H  | -1.973832 | -2.219021 | -0.219505 |
| O  | -4.964972 | 0.354026  | -0.126329 |
| H  | -5.282535 | 1.257220  | -0.071515 |
| Zn | -0.260774 | -0.225466 | 0.086097  |
| O  | -1.587355 | 1.175195  | 0.141476  |
| H  | -1.479230 | 2.115094  | 0.265092  |
| O  | 4.472764  | 1.426193  | -0.123421 |
| H  | 5.265622  | 1.001729  | -0.459029 |
| Zn | 3.056538  | 0.354119  | -0.015862 |
| O  | 1.492061  | -0.487177 | 0.157210  |
| H  | 2.551335  | -1.812478 | -0.042291 |
| O  | 3.535947  | -1.881520 | -0.178994 |
| H  | 3.909724  | -2.429367 | 0.516160  |

**Table S21**Structure: Zn<sub>3</sub>O<sub>5</sub>H<sub>4</sub>**-5716.6406833 Hartree**

0 1

|    |           |           |           |
|----|-----------|-----------|-----------|
| Zn | 3.171646  | -0.096683 | -0.000635 |
| O  | 1.872839  | 1.308210  | -0.067259 |
| H  | 1.992772  | 2.253941  | -0.095974 |
| O  | 4.945322  | -0.349305 | 0.036336  |
| H  | 5.260445  | -1.254374 | 0.070296  |
| Zn | 0.242049  | 0.290139  | -0.060953 |
| O  | 1.547816  | -1.150452 | 0.007002  |
| H  | 1.422953  | -2.095908 | 0.035964  |
| O  | -4.408012 | -1.482689 | -0.074839 |
| H  | -5.256866 | -1.038304 | -0.122681 |
| Zn | -2.954901 | -0.472719 | -0.086720 |
| O  | -1.513273 | 0.496224  | -0.096548 |

**Table S22**

Structure: TS3-2

**-5716.6380686 Hartree**

0 1

|    |           |           |           |
|----|-----------|-----------|-----------|
| Zn | -2.169941 | -0.506891 | 0.057007  |
| O  | -1.603925 | 1.389645  | 0.031904  |
| H  | -2.133630 | 2.182922  | 0.041084  |
| O  | -3.851868 | -1.117410 | 0.075743  |
| H  | -3.995511 | -2.065159 | 0.083963  |
| Zn | 0.239736  | 1.195356  | 0.014183  |
| O  | -0.301043 | -0.767702 | 0.052389  |
| H  | 0.178834  | -1.591767 | -0.017267 |
| O  | 3.689781  | -1.722692 | -0.078196 |
| H  | 4.178709  | -2.016249 | 0.693084  |
| Zn | 2.913648  | -0.133320 | -0.019639 |
| O  | 2.012036  | 1.370918  | -0.004767 |



**Table S23**

Structure: IM3-2

**-5716.6394670 Hartree**

0 1

|    |           |           |           |
|----|-----------|-----------|-----------|
| Zn | -2.035682 | -0.620962 | 0.025363  |
| O  | -1.724491 | 1.358925  | -0.008315 |
| H  | -2.358977 | 2.071433  | -0.003800 |
| O  | -3.694556 | -1.290515 | 0.050724  |
| H  | -3.809688 | -2.241921 | 0.030133  |
| Zn | 0.102003  | 1.425150  | -0.016736 |
| O  | -0.161725 | -0.694739 | 0.022326  |
| H  | 0.327337  | -1.520020 | -0.069147 |
| O  | 2.603639  | -1.962429 | -0.083723 |
| H  | 2.894332  | -2.417811 | 0.709237  |
| Zn | 2.363275  | -0.198028 | -0.019581 |
| O  | 1.884485  | 1.506930  | -0.013691 |

**Table S24**

Structure: TS3-3

**-5716.5832213 Hartree**

0 1

|    |           |           |           |
|----|-----------|-----------|-----------|
| Zn | 1.5011191 | -0.957720 | -0.349025 |
| O  | 1.872754  | 0.919919  | -0.410420 |
| H  | 3.081110  | 0.297058  | -0.126687 |
| O  | 3.448085  | -0.758036 | -0.035667 |
| H  | 4.183734  | -0.951035 | -0.621730 |
| Zn | 0.258537  | 1.583740  | -0.078763 |
| O  | -0.281889 | -1.291571 | -0.266567 |
| H  | -0.731302 | -2.142165 | -0.245367 |
| O  | -2.954553 | -1.726595 | 0.208677  |
| H  | -3.706906 | -1.872470 | -0.367918 |
| Zn | -2.091600 | -0.142650 | 0.162929  |
| O  | -1.478560 | 1.545100  | 0.209768  |

**Table S25**

Structure: IM3-3

**-5716.5846338 Hartree**

0 1

|    |           |           |           |
|----|-----------|-----------|-----------|
| Zn | -1.513338 | -0.901599 | -0.017335 |
| O  | -1.946424 | 0.913229  | 0.027573  |
| H  | -3.409271 | 0.082284  | -0.264020 |
| O  | -3.548882 | -0.914600 | -0.327482 |
| H  | -4.299466 | -1.193281 | 0.203986  |
| Zn | -0.293175 | 1.580332  | 0.015415  |
| O  | 0.250294  | -1.344966 | 0.060065  |
| H  | 0.659889  | -2.213994 | 0.038724  |
| O  | 2.991598  | -1.728375 | -0.073994 |
| H  | 3.690530  | -1.892235 | 0.561919  |
| Zn | 2.077749  | -0.173181 | -0.011791 |
| O  | 1.467650  | 1.518419  | 0.007214  |

**Table S26**Structure: Zn<sub>3</sub>O<sub>4</sub>H<sub>2</sub>**-5640.1052402 Hartree**

0 1

|    |           |           |           |
|----|-----------|-----------|-----------|
| Zn | 1.354003  | -0.674924 | -0.061066 |
| O  | 2.031270  | 0.984717  | -0.031644 |
| Zn | 0.351437  | 1.692322  | -0.008587 |
| O  | -0.269845 | -1.445454 | -0.074568 |
| H  | -0.532946 | -2.366227 | -0.079304 |
| O  | -3.116061 | -1.688126 | 0.068627  |
| H  | -3.889196 | -1.729944 | -0.497298 |
| Zn | -2.060278 | -0.231869 | 0.010350  |
| O  | -1.393889 | 1.443250  | -0.005470 |

**Table S27**

Structure: TS3-4

**-5640.0695660 Hartree**

0 1

|    |           |           |           |
|----|-----------|-----------|-----------|
| Zn | 1.025649  | 1.387511  | 0.002465  |
| O  | 2.387439  | 0.196480  | -0.008924 |
| Zn | 1.270068  | -1.228293 | 0.016906  |
| O  | -0.749979 | 1.374952  | 0.046282  |
| H  | -2.120614 | 1.535275  | -0.176874 |
| O  | -2.992774 | 0.868852  | -0.278874 |
| H  | -3.687803 | 1.080185  | 0.348540  |
| Zn | -1.513047 | -0.434122 | -0.032931 |
| O  | -0.401598 | -1.867944 | 0.028064  |

**Table S28**

Structure: IM3-4

**-5640.0699684 Hartree**

0 1

|    |           |           |            |
|----|-----------|-----------|------------|
| Zn | -0.831950 | 1.467668  | -0.006997  |
| O  | -2.297742 | 0.405785  | 0.028276   |
| Zn | -1.321975 | -1.120495 | 0.005613   |
| O  | 0.942096  | 1.344469  | -0.0617148 |
| H  | 2.513800  | 1.361262  | 0.101662   |
| O  | 3.200808  | 0.596622  | 0.155855   |
| H  | 3.902356  | 0.716550  | -0.488919  |
| Zn | 1.491738  | -0.500572 | -0.005370  |
| O  | 0.301974  | -1.879018 | -0.025504  |

**Table S29**Structure: Zn<sub>3</sub>O<sub>3</sub>**-5563.5895128 Hartree****0 1**

|           |                  |                  |                  |
|-----------|------------------|------------------|------------------|
| <b>Zn</b> | <b>0.740046</b>  | <b>1.484117</b>  | <b>0.009177</b>  |
| <b>O</b>  | <b>2.232023</b>  | <b>0.453196</b>  | <b>-0.025164</b> |
| <b>Zn</b> | <b>1.431180</b>  | <b>-1.174558</b> | <b>-0.015685</b> |
| <b>O</b>  | <b>-1.069186</b> | <b>1.362501</b>  | <b>0.045147</b>  |
| <b>Zn</b> | <b>-1.218430</b> | <b>-0.445113</b> | <b>0.040711</b>  |
| <b>O</b>  | <b>-0.207805</b> | <b>-1.950607</b> | <b>0.014201</b>  |

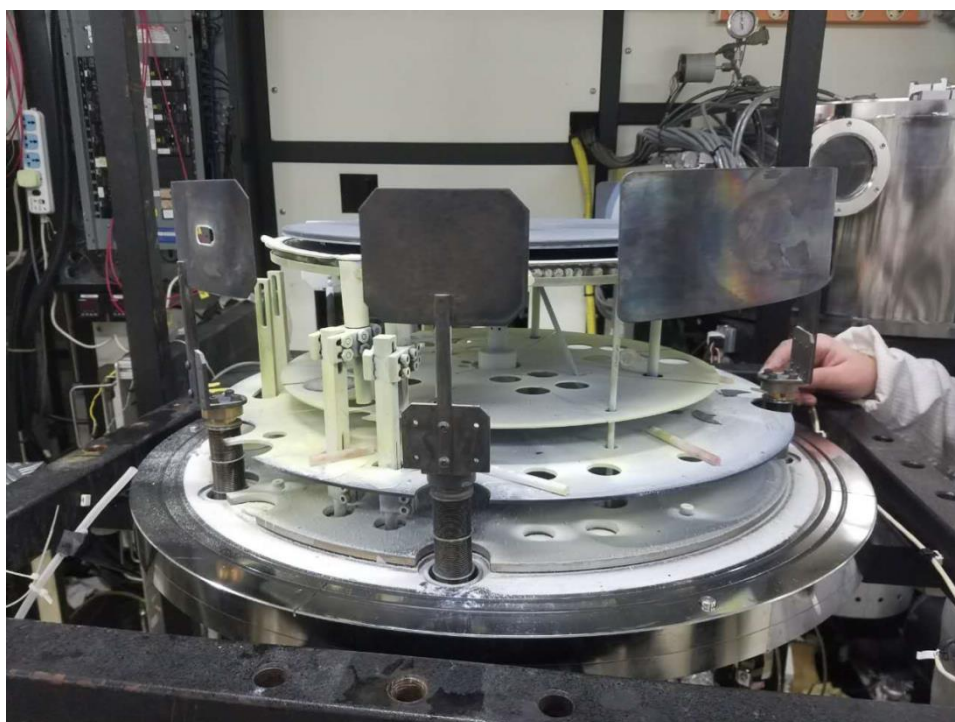

**Fig. S1** Solid particles in the MOCVD reaction chamber

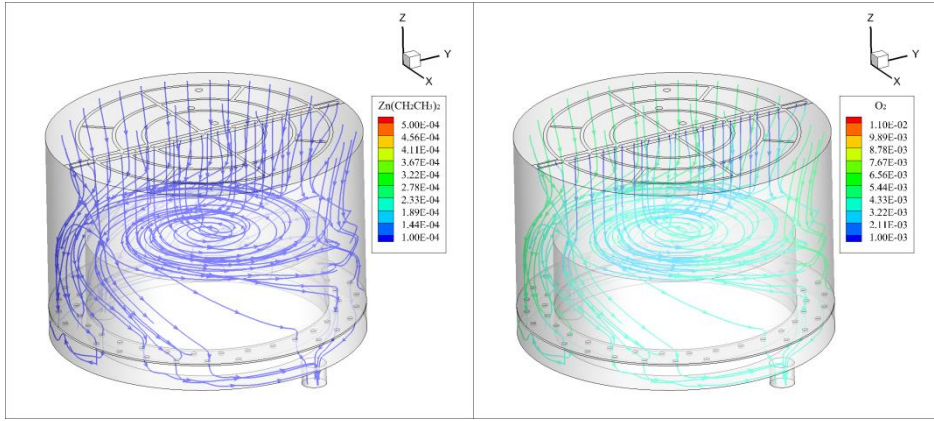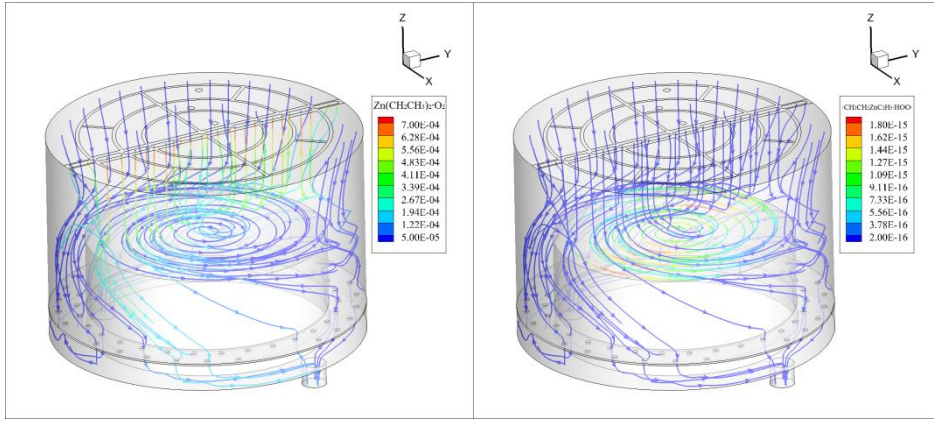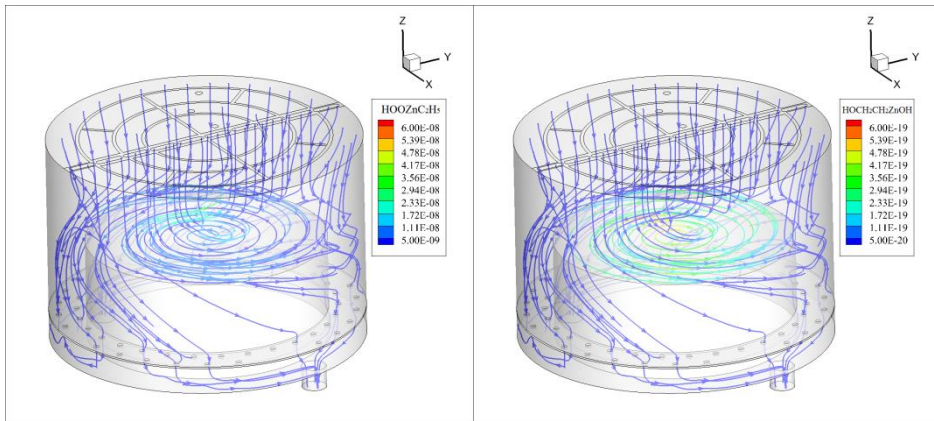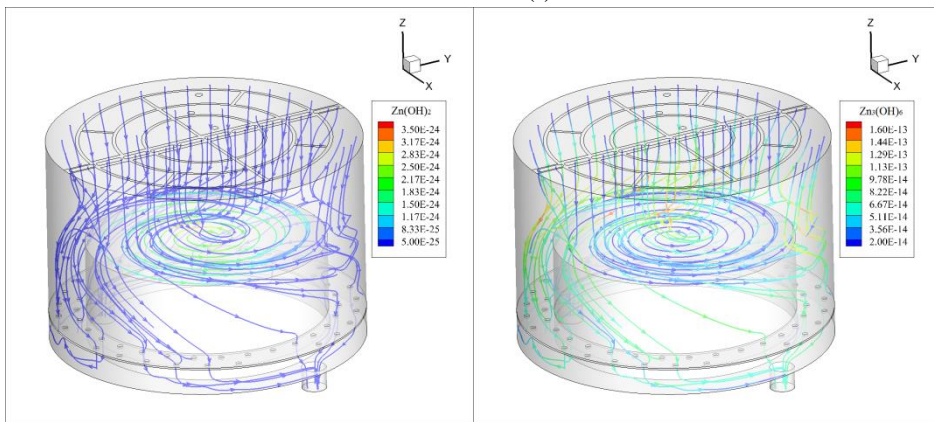

(g)

(h)

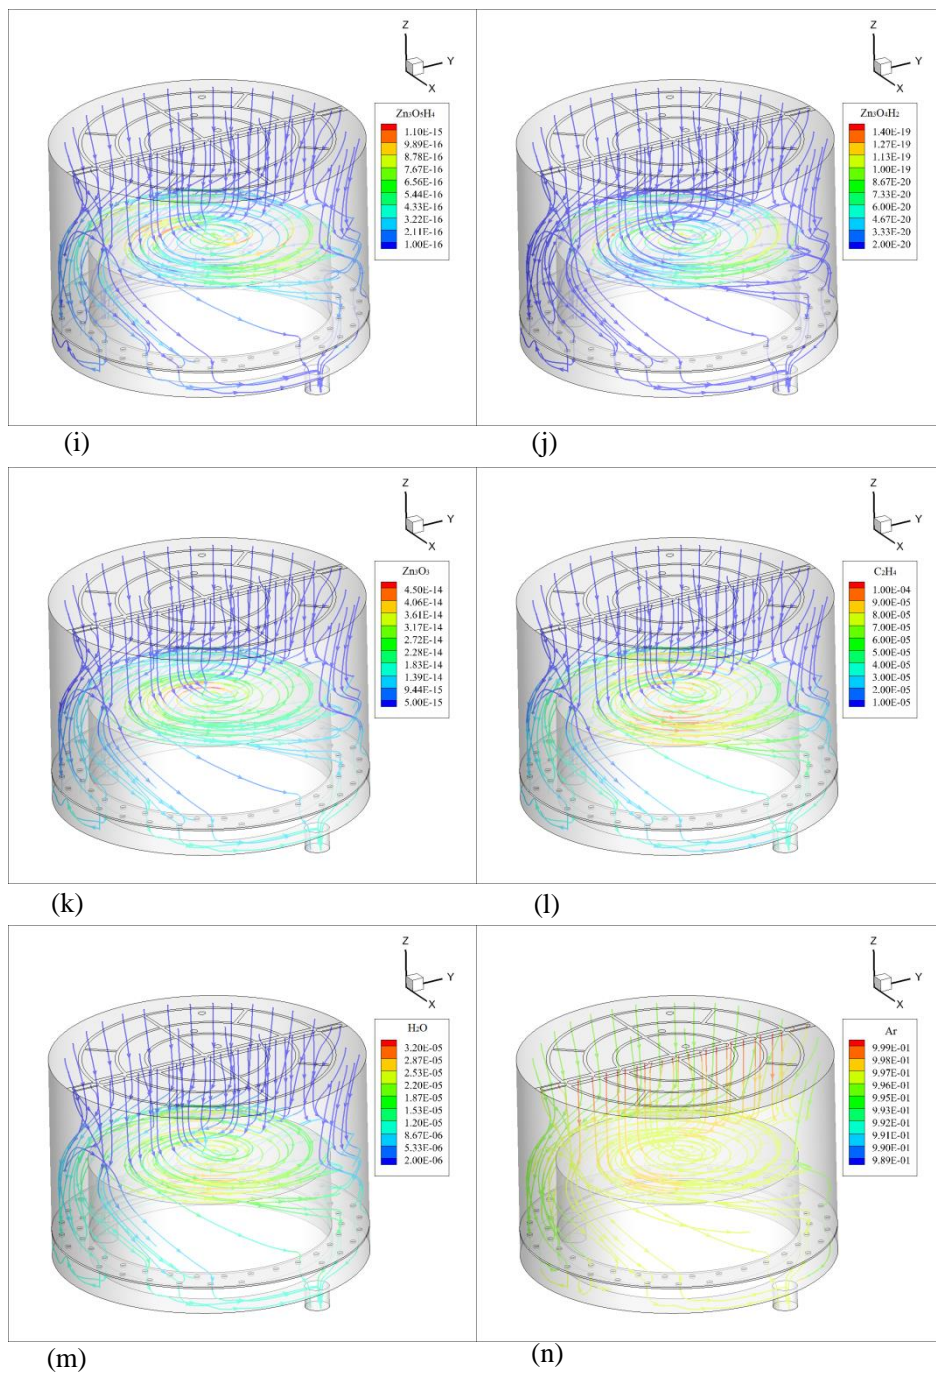

**Fig. S2** The flows of the mass fractions of relevant species with the temperature of 773K: (a)  $\text{Zn}(\text{CH}_2\text{CH}_3)_2$ , (b)  $\text{O}_2$ , (c)  $\text{Zn}(\text{CH}_2\text{CH}_3)_2 \cdot \text{O}_2$ , (d)  $\cdot\text{CH}_2\text{CH}_2\text{ZnC}_2\text{H}_5 \cdot \text{HOO}\cdot$ , (e)  $\text{HOOZnC}_2\text{H}_5$ , (f)  $\text{HOCH}_2\text{CH}_2\text{ZnOH}$ , (g)  $\text{Zn}(\text{OH})_2$ , (h)  $\text{Zn}_3(\text{OH})_6$ , (i)  $\text{Zn}_3\text{O}_5\text{H}_4$ , (j)  $\text{Zn}_3\text{O}_4\text{H}_2$ , (k)  $\text{Zn}_3\text{O}_3$ . (l)  $\text{C}_2\text{H}_4$ , (m)  $\text{H}_2\text{O}$ , (n) Ar

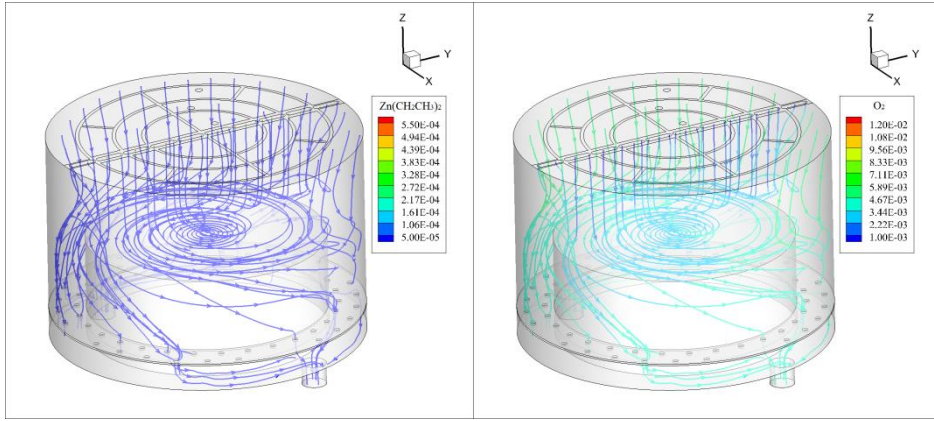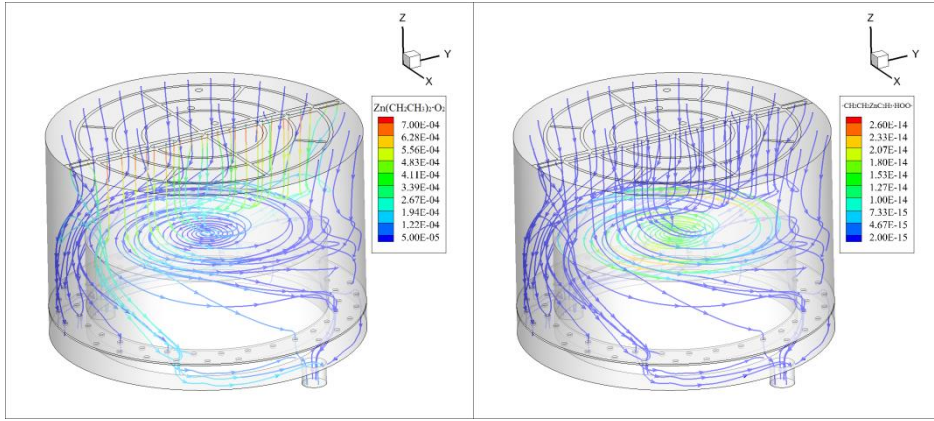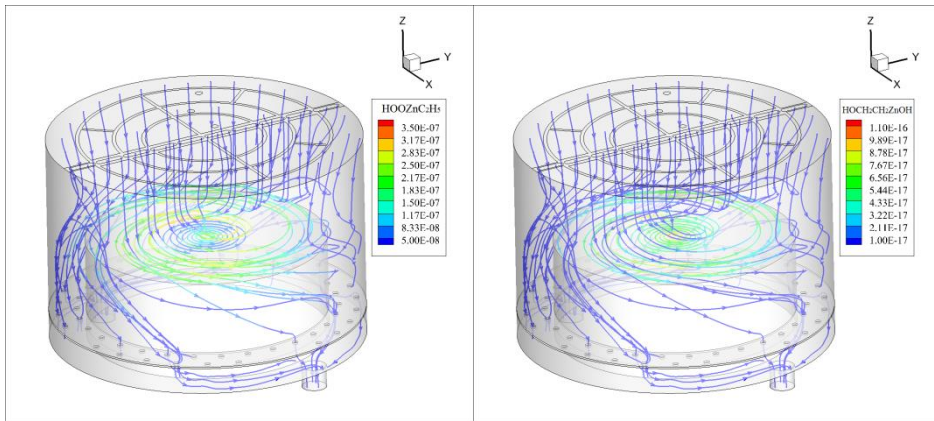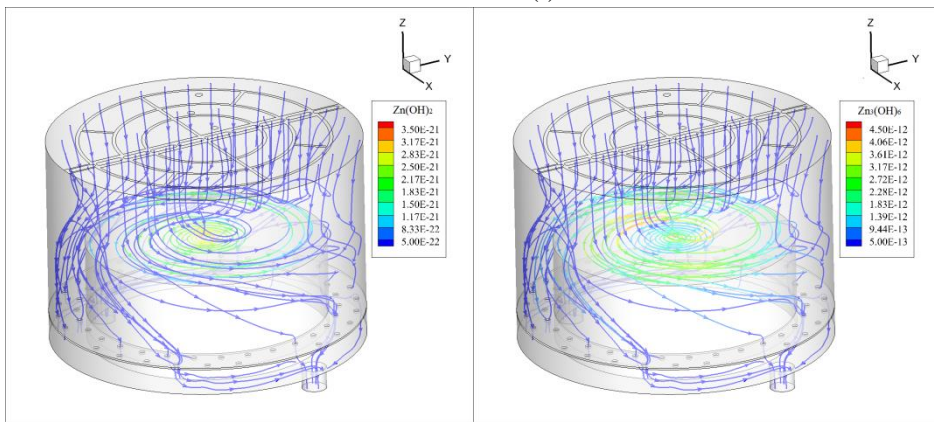

(g)

(h)



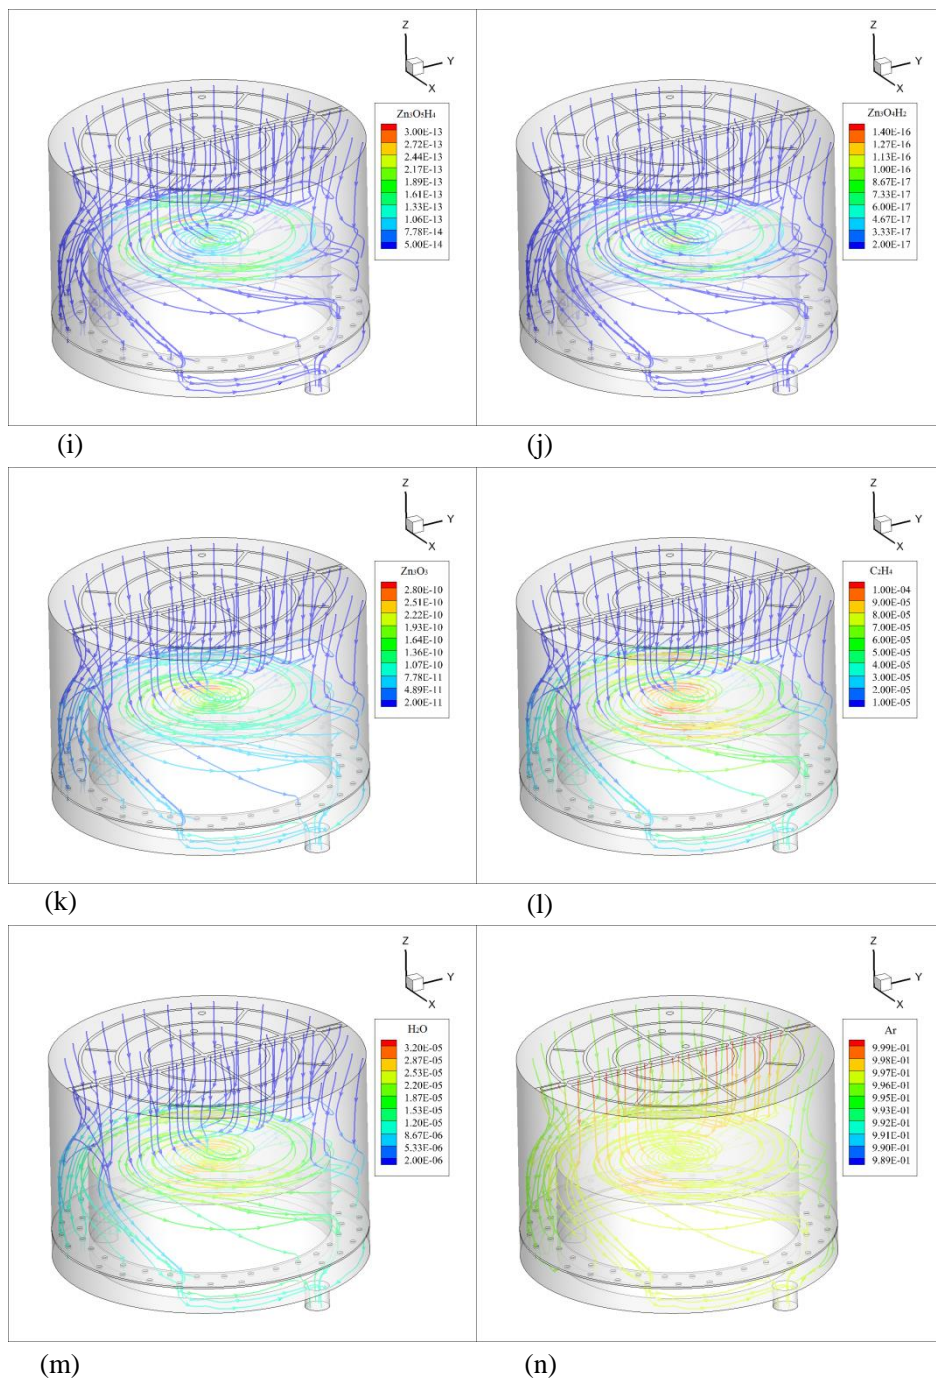

**Fig. S3** The flows of the mass fractions of relevant species with the temperature of 873K: (a)  $\text{Zn}(\text{CH}_2\text{CH}_3)_2$ , (b)  $\text{O}_2$ , (c)  $\text{Zn}(\text{CH}_2\text{CH}_3)_2 \cdot \text{O}_2$ , (d)  $\cdot\text{CH}_2\text{CH}_2\text{ZnC}_2\text{H}_5 \cdot \text{HOO}\cdot$ , (e)  $\text{HOOZnC}_2\text{H}_5$ , (f)  $\text{HOCH}_2\text{CH}_2\text{ZnOH}$ , (g)  $\text{Zn}(\text{OH})_2$ , (h)  $\text{Zn}_3(\text{OH})_6$ , (i)  $\text{Zn}_3\text{O}_5\text{H}_4$ , (j)  $\text{Zn}_3\text{O}_4\text{H}_2$ , (k)  $\text{Zn}_3\text{O}_3$ . (l)  $\text{C}_2\text{H}_4$ , (m)  $\text{H}_2\text{O}$ , (n) Ar

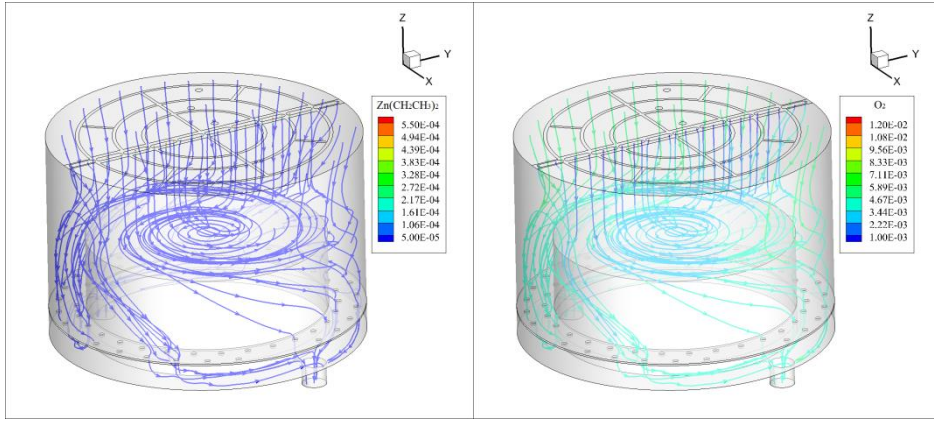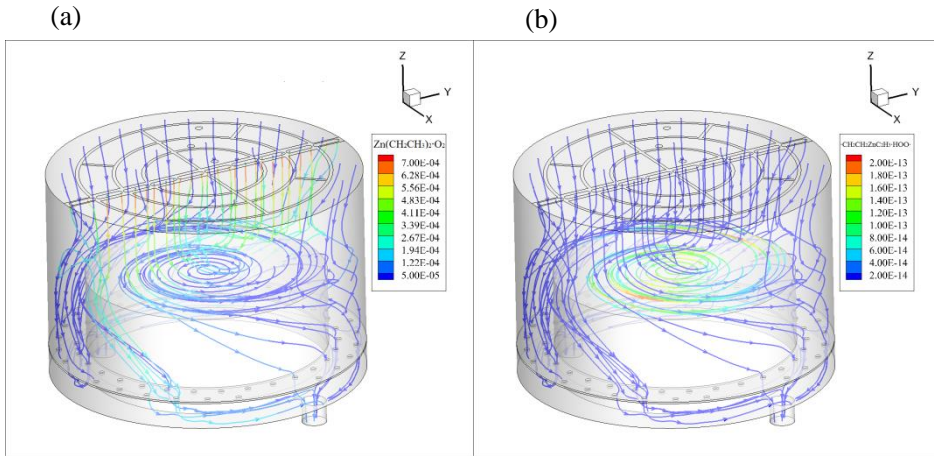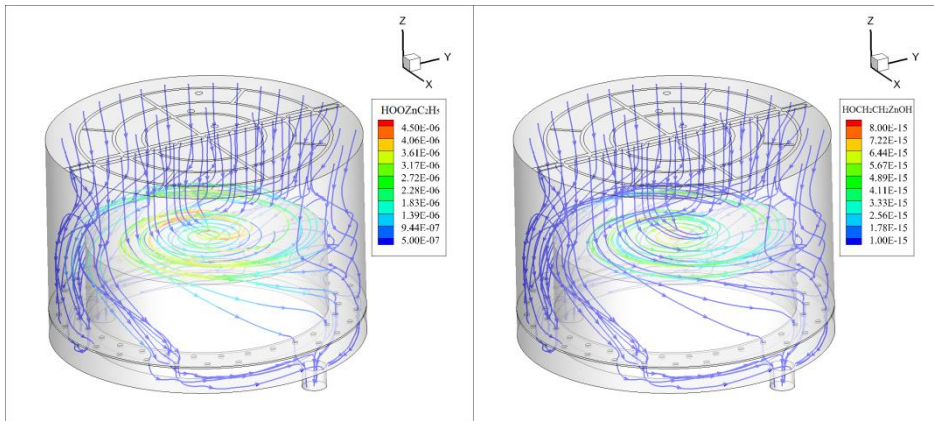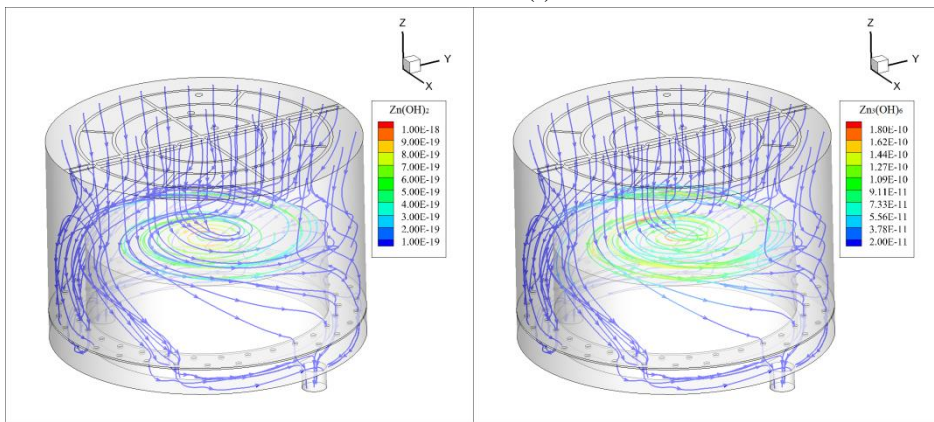

(g)

(h)

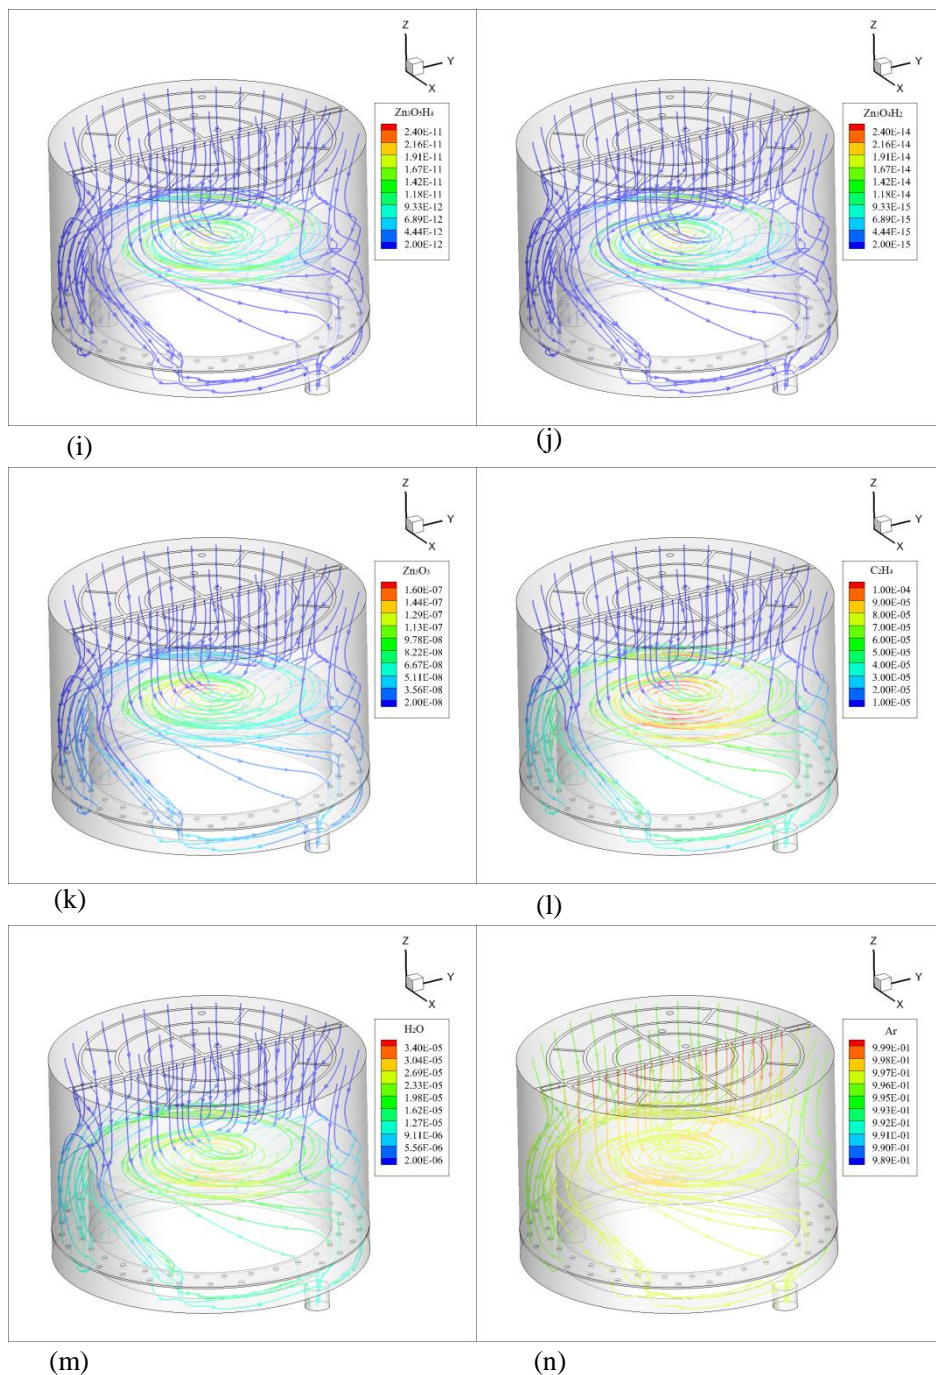

**Fig. S4** The flows of the mass fractions of relevant species with the temperature of 973K: (a)  $\text{Zn}(\text{CH}_2\text{CH}_3)_2$ , (b)  $\text{O}_2$ , (c)  $\text{Zn}(\text{CH}_2\text{CH}_3)_2 \cdot \text{O}_2$ , (d)  $\cdot\text{CH}_2\text{CH}_2\text{ZnC}_2\text{H}_5 \cdot \text{HOO}\cdot$ , (e)  $\text{HOOZnC}_2\text{H}_5$ , (f)  $\text{HOCH}_2\text{CH}_2\text{ZnOH}$ , (g)  $\text{Zn}(\text{OH})_2$ , (h)  $\text{Zn}_3(\text{OH})_6$ , (i)  $\text{Zn}_3\text{O}_5\text{H}_4$ , (j)  $\text{Zn}_3\text{O}_4\text{H}_2$ , (k)  $\text{Zn}_3\text{O}_3$ . (l)  $\text{C}_2\text{H}_4$ , (m)  $\text{H}_2\text{O}$ , (n) Ar

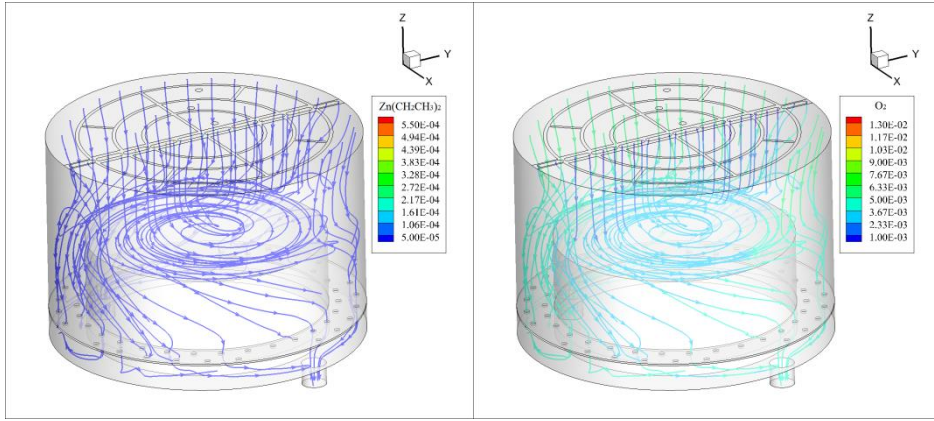

(a)

(b)

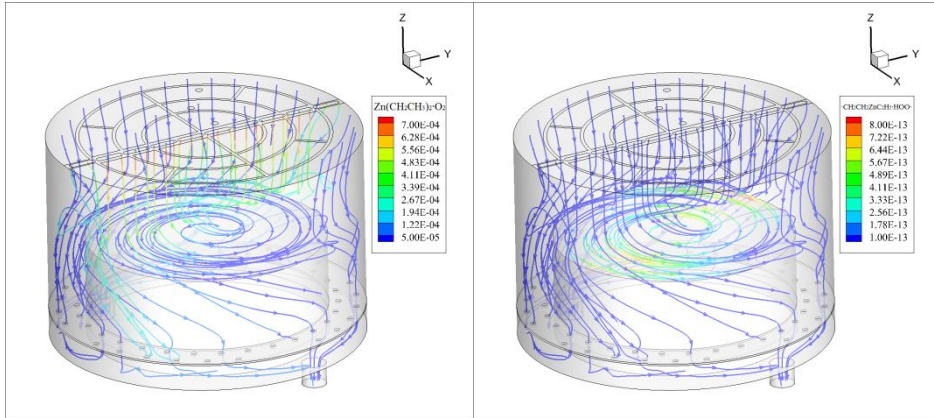

(c)

(d)

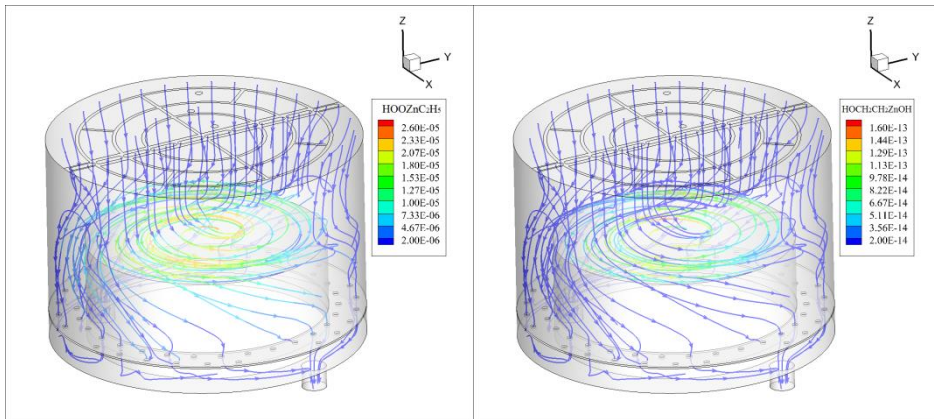

(e)

(f)

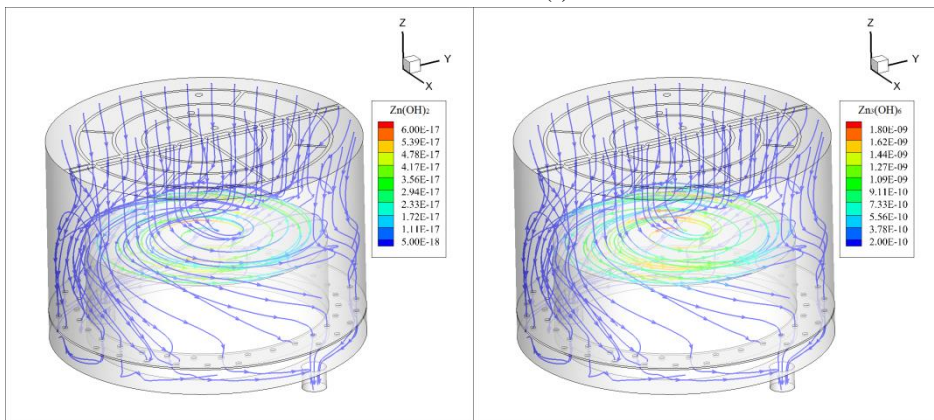

(g)

(h)

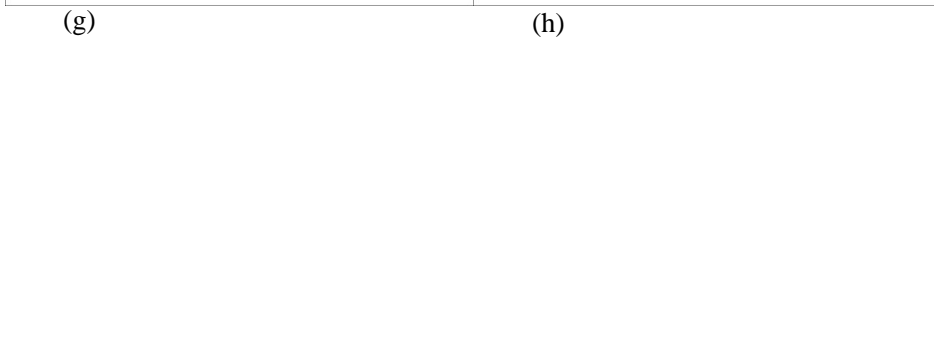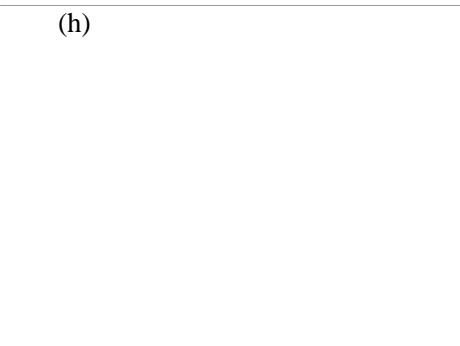

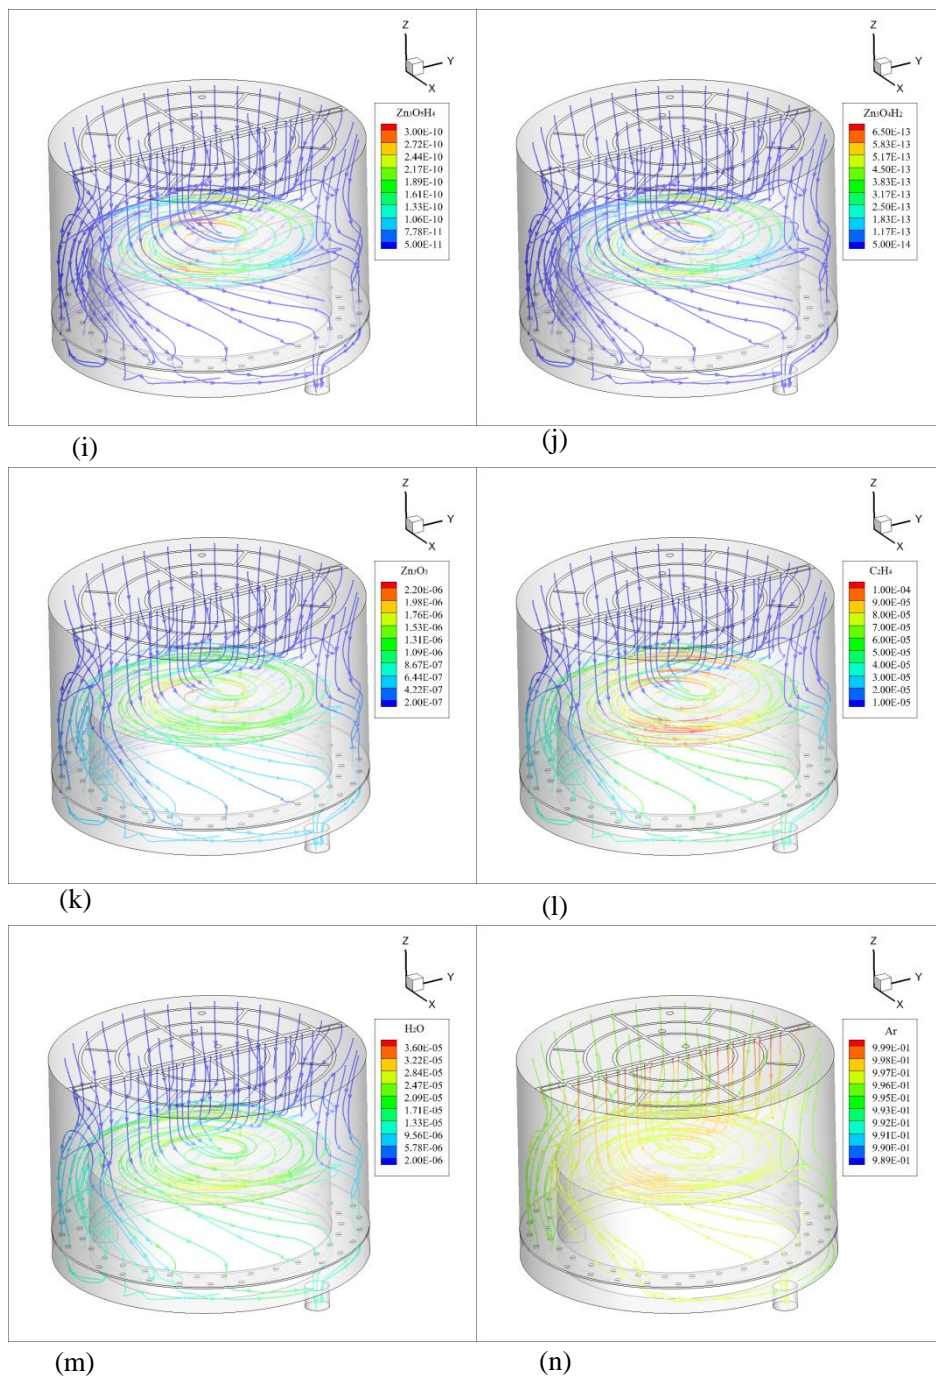

**Fig. S5** The flows of the mass fractions of relevant species with the temperature of 1073K: (a)  $Zn(CH_2CH_3)_2$ , (b)  $O_2$ , (c)  $Zn(CH_2CH_3)_2\cdot O_2$ , (d)  $\cdot CH_2CH_2ZnC_2H_5\cdot HOO\cdot$ , (e)  $HOOZnC_2H_5$ , (f)  $HOCH_2CH_2ZnOH$ , (g)  $Zn(OH)_2$ , (h)  $Zn_3(OH)_6$ , (i)  $Zn_3O_5H_4$ , (j)  $Zn_3O_4H_2$ , (k)  $Zn_3O_3$ , (l)  $C_2H_4$ , (m)  $H_2O$ , (n)  $Ar$
